# Supplementary material
Source: MDPI journal article supplement (https://www.mdpi.com/2071-1050/13/10/5349)
Supplement: s1 [file s1]

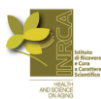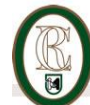

## Studio sull'organizzazione delle famiglie marchigiane nell'assistenza della popolazione anziana non autosufficiente

### Questionario inerente la PERSONA ANZIANA NON AUTOSUFFICIENTE

|                   |       |                    |                                 |   |   |              |
|-------------------|-------|--------------------|---------------------------------|---|---|--------------|
| Distretto N.:     |       | Sesso intervistato | M                               | ① | F | ②            |
| Età intervistato: | 75-79 | ①                  | Sigla Intervistatore:           |   |   |              |
|                   | 80-84 | ②                  | Numero progressivo intervistato |   |   |              |
|                   | 85+:  | ③                  | Data intervista (GG/MM/ANNO):   |   |   | __ / __ / __ |

**A. Dati socio-demografici:** Per iniziare le farò alcune domande su di lei, quando è nato, che tipo di studi ha fatto, il lavoro svolto etc.

|    |                                                      |                                             |   |    |   |
|----|------------------------------------------------------|---------------------------------------------|---|----|---|
| 1. | Età (anni compiuti al momento dell'intervista)       |                                             |   |    |   |
| 2. | Cittadinanza                                         |                                             |   |    |   |
| 3. | Stato civile                                         | Coniugato/a o in coppia convivente/di fatto | ① |    |   |
|    |                                                      | Separato/a, divorziato/a                    | ② |    |   |
|    |                                                      | Vedovo/a                                    | ③ |    |   |
|    |                                                      | Celibe/Nubile                               | ④ |    |   |
| 4. | Titolo di studio                                     | Nessun titolo                               | ① |    |   |
|    |                                                      | Licenza elementare                          | ② |    |   |
|    |                                                      | Licenza media                               | ③ |    |   |
|    |                                                      | Diploma di scuola superiore                 | ④ |    |   |
|    |                                                      | Diploma post-secondario (non terziario)     | ⑤ |    |   |
|    |                                                      | Diploma terziario di tipo professionale     | ⑥ |    |   |
|    |                                                      | Laurea triennale (diploma accademico)       | ⑦ |    |   |
|    |                                                      | Laurea specialistica (Master)               | ⑧ |    |   |
|    |                                                      | Dottorato di ricerca                        | ⑨ |    |   |
| 5. | Attività svolta prevalentemente nel corso della vita | Lavoratore dipendente nel settore privato   | ① |    |   |
|    |                                                      | Lavoratore dipendente nel settore pubblico  | ② |    |   |
|    |                                                      | Lavoratore autonomo                         | ③ |    |   |
|    |                                                      | Casalinga/o                                 | ④ |    |   |
|    |                                                      | Altro, specificare _____                    | ⑤ |    |   |
| 6. | Con chi vive? (rispondere a tutte le domande)        |                                             |   |    |   |
|    | Da solo                                              | Sì                                          | ① | No | ② |
|    | Con coniuge o compagno/a                             | Sì                                          | ① | No | ② |
|    | Con figli/figlie                                     | Sì                                          | ① | No | ② |
|    | Con assistenti a pagamento ("badante" convivente)    | Sì                                          | ① | No | ② |
|    | Con altri (specificare: _____)                       | Sì                                          | ① | No | ② |

|                                                                                                                  |                                                                                                                                              |                            |                             |
|------------------------------------------------------------------------------------------------------------------|----------------------------------------------------------------------------------------------------------------------------------------------|----------------------------|-----------------------------|
| 7.                                                                                                               | Totale persone conviventi (compreso l'anziano): _____                                                                                        |                            |                             |
| <b>B. Abitazione</b>                                                                                             |                                                                                                                                              |                            |                             |
| 8. <b>L'abitazione in cui abita è:</b><br>① di sua proprietà      ② in affitto      ③ altro (specificare: _____) |                                                                                                                                              |                            |                             |
| 9.                                                                                                               | <b>Nella sua abitazione sono presenti degli accorgimenti che le permettono di svolgere più autonomamente le attività di vita quotidiana?</b> | <b>Sì</b>                  | <b>No, ma sarebbe utile</b> |
|                                                                                                                  | Vani delle porte allargati                                                                                                                   | ②                          | ①                           |
|                                                                                                                  | Corrimani                                                                                                                                    | ②                          | ①                           |
|                                                                                                                  | Modifiche in bagno (e quali: _____)                                                                                                          | ②                          | ①                           |
|                                                                                                                  | Modifiche in cucina (e quali: _____)                                                                                                         | ②                          | ①                           |
|                                                                                                                  | Dispositivi di allarme (pulsanti, sensori) o di chiamata automatica (e quali: _____)                                                         | ②                          | ①                           |
|                                                                                                                  | Altro (specificare) _____<br>_____<br>_____                                                                                                  | ②                          | ①                           |
| 10.                                                                                                              | <b>Si sente sicuro nella sua abitazione? (N.B.: NON RISPONDERE SE L'ANZIANO NON E' IN GRADO DI FARLO DA SOLO)</b>                            | <b>Molto sicuro</b>        | ①                           |
|                                                                                                                  |                                                                                                                                              | <b>Abbastanza sicuro</b>   | ②                           |
|                                                                                                                  |                                                                                                                                              | <b>Abbastanza insicuro</b> | ③                           |
|                                                                                                                  |                                                                                                                                              | <b>Molto insicuro</b>      | ④                           |
|                                                                                                                  | <b>Se insicuro, può spiegare perché?</b> _____<br>_____                                                                                      |                            |                             |

|                                                                |                                                                                                                      |                  |            |               |
|----------------------------------------------------------------|----------------------------------------------------------------------------------------------------------------------|------------------|------------|---------------|
| <b>C. Stato di salute, autonomia ed esigenze assistenziali</b> |                                                                                                                      |                  |            |               |
| 11.                                                            | <b>In generale, come giudica la sua salute? (N.B.: NON RISPONDERE SE L'ANZIANO NON E' IN GRADO DI FARLO DA SOLO)</b> |                  |            |               |
|                                                                | Eccellente<br>①                                                                                                      | Molto buona<br>② | Buona<br>③ | Discreta<br>④ |
|                                                                |                                                                                                                      |                  |            | Cattiva<br>⑤  |

|                                                                                                                                                                                                |                                                               |                                                     |                                                                                   |                                                                |                                                               |
|------------------------------------------------------------------------------------------------------------------------------------------------------------------------------------------------|---------------------------------------------------------------|-----------------------------------------------------|-----------------------------------------------------------------------------------|----------------------------------------------------------------|---------------------------------------------------------------|
| <b>Ora mi può dire se lei è in grado di svolgere le seguenti attività senza aiuto, con un po' di aiuto altrii, oppure non sarebbe assolutamente in grado di svolgerle, neanche se aiutato?</b> |                                                               |                                                     |                                                                                   |                                                                |                                                               |
| 12.                                                                                                                                                                                            | Muoversi per casa                                             | ①<br>Non in grado                                   | ①<br>una sedia a rotelle senza aiuto o camminando con un aiuto fisico consistente | ②<br>Camminando con un po' di aiuto (guidato o supervisionato) | ③<br>Senza aiuto, anche usando un ausilio (ad es. un bastone) |
| 13.                                                                                                                                                                                            | Spostarsi da solo dal letto alla sedia, se questi sono vicini | ①<br>Non ha equilibrio sufficiente per stare seduto | ①<br>Aiuto fisico consistente (1 o 2 persone)                                     | ②<br>Aiuto minore (verbale o fisico)                           | ③<br>Senza aiuto                                              |

|     |                                                                          | Non in grado | Con un po' di aiuto | Senza aiuto |
|-----|--------------------------------------------------------------------------|--------------|---------------------|-------------|
| 14. | Fare le scale                                                            | ①            | ②                   | ③           |
| 15. | Usare il gabinetto                                                       | ①            | ②                   | ③           |
| 16. | Farsi il bagno o la doccia                                               | ①            | ②                   | ③           |
| 17. | Avere cura del suo aspetto (pettinarsi, truccarsi, farsi la barba, ecc.) | ①            | ②                   | ③           |
| 18. | Vestirsi da solo                                                         | ①            | ②                   | ③           |
| 19. | Mangiare da solo                                                         | ①            | ②                   | ③           |
| 20. | Lavori di casa (pulire pavimenti etc.)                                   | ①            | ②                   | ③           |
| 21. | Prepararsi da mangiare                                                   | ①            | ②                   | ③           |
| 22. | Andare a far spese                                                       | ①            | ②                   | ③           |
| 23. | Gestire i suoi soldi                                                     | ①            | ②                   | ③           |
| 24. | Fare una telefonata                                                      | ①            | ②                   | ③           |
| 25. | Prendere le sue medicine                                                 | ①            | ②                   | ③           |
| 26. | Camminare fuori di casa                                                  | ①            | ②                   | ③           |

|     | Incontinenza                                                                                   | Frequentemente                                                    | Occasionalmente                          | No<br>(Continente) |
|-----|------------------------------------------------------------------------------------------------|-------------------------------------------------------------------|------------------------------------------|--------------------|
| 27. | Le capita di non riuscire a controllare il <b>bisogno di urinare</b> (incontinenza vescicale)? | ①<br>Una o più volte al giorno<br>oppure necessita di catetere    | ②<br>Meno di una<br>volta al giorno      | ③<br>No            |
| 28. | Le capita di avere <b>problemi intestinali</b> (incontinenza fecale o necessita di clistere)?  | ①<br>Una o più volte la settimana<br>oppure necessita di clistere | ②<br>Meno di una volta<br>alla settimana | ③<br>No            |

| Ora le farò alcune domande per capire come riesce a “orientarsi”: |                                                                  | Corretto | Errato |
|-------------------------------------------------------------------|------------------------------------------------------------------|----------|--------|
| 29.                                                               | Quale è la data di oggi (giorno, mese, anno)?                    | ①        | ②      |
| 30.                                                               | Che giorno della settimana è oggi?                               | ①        | ②      |
| 31.                                                               | Quale è il nome di questo posto?                                 | ①        | ②      |
| 32.                                                               | Quale è il suo numero di telefono (o indirizzo di casa)?         | ①        | ②      |
| 33.                                                               | Quanti anni ha?                                                  | ①        | ②      |
| 34.                                                               | Quando è nato?                                                   | ①        | ②      |
| 35.                                                               | Chi è il Papa attuale Papa (o il Presidente della Repubblica)?   | ①        | ②      |
| 36.                                                               | Chi era il Papa precedente? (o il Presidente della Repubblica)?  | ①        | ②      |
| 37.                                                               | Quale era il nome di sua madre prima di sposarsi? *              | ①        | ②      |
| 38.                                                               | Faccia «20-3» e ora ancora -3 fino a 2                           | ①        | ②      |
| 39.                                                               | <b>(da non chiedere) L'intervistato è riuscito a rispondere?</b> | Si ①     | No ②   |

\*: Si considera corretta se il soggetto indica un nome di donna con un cognome differente dal proprio (in caso di omonimia, casuale o per parentela, fra padre e madre la risposta con lo stesso cognome è da intendersi corretta.

## D. Supporto ricevuto

| Da chi,<br>e con che frequenza settimanale,<br>riceve aiuto per le seguenti<br>attività? |                                                                      | Non ho<br>bisogno<br>di aiuto<br>per<br>questa<br>attività | Famigliare principale<br>(colui che risponde al<br>questionario del<br>caregiver) |                    | Altri<br>famigliari |     | Altri<br>informali<br>(vicini,<br>amici,<br>volontari) |     | Assistente<br>privato<br>convivente |     | Altro<br>assistente<br>privato (ad<br>es. colf) |     | Operatori di<br>organizzazioni<br>private |     | Operatori<br>del<br>Comune |     | Operatori<br>della ASL |     |
|------------------------------------------------------------------------------------------|----------------------------------------------------------------------|------------------------------------------------------------|-----------------------------------------------------------------------------------|--------------------|---------------------|-----|--------------------------------------------------------|-----|-------------------------------------|-----|-------------------------------------------------|-----|-------------------------------------------|-----|----------------------------|-----|------------------------|-----|
|                                                                                          |                                                                      |                                                            | giorni a<br>settimana                                                             | ore a<br>settimana | giorni              | ore | giorni                                                 | ore | giorni                              | ore | giorni                                          | ore | giorni                                    | ore | giorni                     | ore | giorni                 | ore |
| 40.                                                                                      | Cura ed igiene personale                                             | ①                                                          |                                                                                   |                    |                     |     |                                                        |     |                                     |     |                                                 |     |                                           |     |                            |     |                        |     |
| 41.                                                                                      | Mobilità domestica                                                   | ①                                                          |                                                                                   |                    |                     |     |                                                        |     |                                     |     |                                                 |     |                                           |     |                            |     |                        |     |
| 42.                                                                                      | Vigilanza e/o supervisione                                           | ①                                                          |                                                                                   |                    |                     |     |                                                        |     |                                     |     |                                                 |     |                                           |     |                            |     |                        |     |
| 43.                                                                                      | Compiti / lavori domestici<br>(compreso cucinare)                    | ①                                                          |                                                                                   |                    |                     |     |                                                        |     |                                     |     |                                                 |     |                                           |     |                            |     |                        |     |
| 44.                                                                                      | Mobilità extradomestica (inclusi<br>trasporti e commissioni esterne) | ①                                                          |                                                                                   |                    |                     |     |                                                        |     |                                     |     |                                                 |     |                                           |     |                            |     |                        |     |

| Se viene aiutata da un'assistente privata a pagamento ("badante"), potrebbe indicarci alcuni aspetti dell'aiuto che le fornisce? |                                                                                                            |  |  |  |  |  |  |            |                |
|----------------------------------------------------------------------------------------------------------------------------------|------------------------------------------------------------------------------------------------------------|--|--|--|--|--|--|------------|----------------|
| 45.                                                                                                                              | Non vengo aiutato/a da un'assistente privata                                                               |  |  |  |  |  |  | ①          |                |
|                                                                                                                                  |                                                                                                            |  |  |  |  |  |  | Convivente | Non convivente |
| 46.                                                                                                                              | Da quanti mesi ha questo tipo di aiuto? (considerando tutte le assistenti che si sono succedute nel tempo) |  |  |  |  |  |  |            |                |
| 47.                                                                                                                              | In totale, per quante ore a settimana? (in media)                                                          |  |  |  |  |  |  |            |                |
| 48.                                                                                                                              | Con quale costo mensile?                                                                                   |  |  |  |  |  |  |            |                |
| 49.                                                                                                                              | Di che nazionalità è l'assistente?                                                                         |  |  |  |  |  |  |            |                |
| 50.                                                                                                                              | E' uomo o donna?                                                                                           |  |  |  |  |  |  | M          | F              |
|                                                                                                                                  |                                                                                                            |  |  |  |  |  |  | ①          | ②              |
| 51.                                                                                                                              | Che età ha?                                                                                                |  |  |  |  |  |  |            |                |
| 52.                                                                                                                              | Sa se ha ricevuto una formazione specifica su come svolgere assistenza a persone anziane o disabili?       |  |  |  |  |  |  | Si         | No             |
|                                                                                                                                  |                                                                                                            |  |  |  |  |  |  | ①          | ②              |
| 53.                                                                                                                              | Se sì, da chi l'ha ricevuta? (specificare) :                                                               |  |  |  |  |  |  |            |                |
| 54.                                                                                                                              | Cosa pensa dell'aiuto che riceve da questa/e assistente/i? _____                                           |  |  |  |  |  |  |            |                |
|                                                                                                                                  | _____                                                                                                      |  |  |  |  |  |  |            |                |

## E. Utilizzo di servizi

| Oltre all'assistenza da familiari/badanti, nell'ultimo anno ha utilizzato altri servizi, ad esempio del Comune, della ASL o privati? |                         |                      |                                  |         |                   |                                                                          |                                    |               |              |             |                      |                                                                                                                                                                                                                                               |   |   |   |   |   |    |
|--------------------------------------------------------------------------------------------------------------------------------------|-------------------------|----------------------|----------------------------------|---------|-------------------|--------------------------------------------------------------------------|------------------------------------|---------------|--------------|-------------|----------------------|-----------------------------------------------------------------------------------------------------------------------------------------------------------------------------------------------------------------------------------------------|---|---|---|---|---|----|
| Tipo di servizio                                                                                                                     |                         | Si,<br>l'ho<br>usato | Con che frequenza<br>l'ha usato? |         |                   | Quanto<br>ha dovuto<br>pagare<br>per<br>questo<br>servizio,<br>all'anno? | E' soddisfatto di questo servizio? |               |              |             |                      | Se non è soddisfatto, perché?<br>1. costo elevato<br>2. lunghe liste d'attesa<br>3. distanza/carenza di trasporti;<br>4. burocrazia per usarlo<br>5. qualità inadeguata<br>6. quantità insufficiente<br>7. altro (spec. in pagina successiva) |   |   |   |   |   |    |
|                                                                                                                                      |                         |                      | Settimanale                      | Mensile | Meno<br>frequente |                                                                          | Molto<br>insoddisfatto             | Insoddisfatto | Così<br>così | Soddisfatto | Molto<br>soddisfatto | 1                                                                                                                                                                                                                                             | 2 | 3 | 4 | 5 | 6 | 7* |
| <b>Pubblico</b>                                                                                                                      |                         |                      |                                  |         |                   |                                                                          |                                    |               |              |             |                      |                                                                                                                                                                                                                                               |   |   |   |   |   |    |
| <b>Ambulatoriale</b>                                                                                                                 |                         |                      |                                  |         |                   |                                                                          |                                    |               |              |             |                      |                                                                                                                                                                                                                                               |   |   |   |   |   |    |
| 55.                                                                                                                                  | Medico di base          | ①                    | ①                                | ②       | ③                 |                                                                          | ①                                  | ②             | ③            | ④           | ⑤                    | ①                                                                                                                                                                                                                                             | ② | ③ | ④ | ⑤ | ⑥ | ⑦  |
| 56.                                                                                                                                  | Medico specialista      | ①                    | ①                                | ②       | ③                 |                                                                          | ①                                  | ②             | ③            | ④           | ⑤                    | ①                                                                                                                                                                                                                                             | ② | ③ | ④ | ⑤ | ⑥ | ⑦  |
| 57.                                                                                                                                  | Infermiere              | ①                    | ①                                | ②       | ③                 |                                                                          | ①                                  | ②             | ③            | ④           | ⑤                    | ①                                                                                                                                                                                                                                             | ② | ③ | ④ | ⑤ | ⑥ | ⑦  |
| 58.                                                                                                                                  | Terapista riabilitativo | ①                    | ①                                | ②       | ③                 |                                                                          | ①                                  | ②             | ③            | ④           | ⑤                    | ①                                                                                                                                                                                                                                             | ② | ③ | ④ | ⑤ | ⑥ | ⑦  |
| 59.                                                                                                                                  | Assistente sociale      | ①                    | ①                                | ②       | ③                 |                                                                          | ①                                  | ②             | ③            | ④           | ⑤                    | ①                                                                                                                                                                                                                                             | ② | ③ | ④ | ⑤ | ⑥ | ⑦  |
| 60.                                                                                                                                  | Altro (spec.) _____     | ①                    | ①                                | ②       | ③                 |                                                                          | ①                                  | ②             | ③            | ④           | ⑤                    | ①                                                                                                                                                                                                                                             | ② | ③ | ④ | ⑤ | ⑥ | ⑦  |
| <b>Domiciliare</b>                                                                                                                   |                         |                      |                                  |         |                   |                                                                          |                                    |               |              |             |                      |                                                                                                                                                                                                                                               |   |   |   |   |   |    |
| 61.                                                                                                                                  | Infermiere              | ①                    | ①                                | ②       | ③                 |                                                                          | ①                                  | ②             | ③            | ④           | ⑤                    | ①                                                                                                                                                                                                                                             | ② | ③ | ④ | ⑤ | ⑥ | ⑦  |
| 62.                                                                                                                                  | Terapista riabilitativo | ①                    | ①                                | ②       | ③                 |                                                                          | ①                                  | ②             | ③            | ④           | ⑤                    | ①                                                                                                                                                                                                                                             | ② | ③ | ④ | ⑤ | ⑥ | ⑦  |
| 63.                                                                                                                                  | Cura personale          | ①                    | ①                                | ②       | ③                 |                                                                          | ①                                  | ②             | ③            | ④           | ⑤                    | ①                                                                                                                                                                                                                                             | ② | ③ | ④ | ⑤ | ⑥ | ⑦  |
| 64.                                                                                                                                  | Cura della casa         | ①                    | ①                                | ②       | ③                 |                                                                          | ①                                  | ②             | ③            | ④           | ⑤                    | ①                                                                                                                                                                                                                                             | ② | ③ | ④ | ⑤ | ⑥ | ⑦  |
| 65.                                                                                                                                  | Pasti a domicilio       | ①                    | ①                                | ②       | ③                 |                                                                          | ①                                  | ②             | ③            | ④           | ⑤                    | ①                                                                                                                                                                                                                                             | ② | ③ | ④ | ⑤ | ⑥ | ⑦  |
| 66.                                                                                                                                  | Altro:                  | ①                    | ①                                | ②       | ③                 |                                                                          | ①                                  | ②             | ③            | ④           | ⑤                    | ①                                                                                                                                                                                                                                             | ② | ③ | ④ | ⑤ | ⑥ | ⑦  |
| <b>Altro servizio</b>                                                                                                                |                         |                      |                                  | ③       |                   |                                                                          |                                    |               |              |             |                      |                                                                                                                                                                                                                                               |   |   |   |   |   |    |
| 67.                                                                                                                                  | Trasporto               | ①                    | ①                                | ②       | ③                 |                                                                          | ①                                  | ②             | ③            | ④           | ⑤                    | ①                                                                                                                                                                                                                                             | ② | ③ | ④ | ⑤ | ⑥ | ⑦  |
| 68.                                                                                                                                  | Centro diurno           | ①                    | ①                                | ②       | ③                 |                                                                          | ①                                  | ②             | ③            | ④           | ⑤                    | ①                                                                                                                                                                                                                                             | ② | ③ | ④ | ⑤ | ⑥ | ⑦  |
| 69.                                                                                                                                  | Altro:                  | ①                    | ①                                | ②       | ③                 |                                                                          | ①                                  | ②             | ③            | ④           | ⑤                    | ①                                                                                                                                                                                                                                             | ② | ③ | ④ | ⑤ | ⑥ | ⑦  |
| <b>Privato</b>                                                                                                                       |                         |                      |                                  |         |                   |                                                                          |                                    |               |              |             |                      |                                                                                                                                                                                                                                               |   |   |   |   |   |    |
| 70.                                                                                                                                  | Medico specialista      | ①                    | ①                                | ②       | ③                 |                                                                          | ①                                  | ②             | ③            | ④           | ⑤                    | ①                                                                                                                                                                                                                                             | ② | ③ | ④ | ⑤ | ⑥ | ⑦  |
| 71.                                                                                                                                  | Infermiere              | ①                    | ①                                | ②       | ③                 |                                                                          | ①                                  | ②             | ③            | ④           | ⑤                    | ①                                                                                                                                                                                                                                             | ② | ③ | ④ | ⑤ | ⑥ | ⑦  |
| 72.                                                                                                                                  | Terapista riabilitativo | ①                    | ①                                | ②       | ③                 |                                                                          | ①                                  | ②             | ③            | ④           | ⑤                    | ①                                                                                                                                                                                                                                             | ② | ③ | ④ | ⑤ | ⑥ | ⑦  |
| 73.                                                                                                                                  | Colf (domestica)        | ①                    | ①                                | ②       | ③                 |                                                                          | ①                                  | ②             | ③            | ④           | ⑤                    | ①                                                                                                                                                                                                                                             | ② | ③ | ④ | ⑤ | ⑥ | ⑦  |
| 74.                                                                                                                                  | Residenza temporanea    | ①                    | ①                                | ②       | ③                 |                                                                          | ①                                  | ②             | ③            | ④           | ⑤                    | ①                                                                                                                                                                                                                                             | ② | ③ | ④ | ⑤ | ⑥ | ⑦  |
| 75.                                                                                                                                  | Altro:                  | ①                    | ①                                | ②       | ③                 |                                                                          | ①                                  | ②             | ③            | ④           | ⑤                    | ①                                                                                                                                                                                                                                             | ② | ③ | ④ | ⑤ | ⑥ | ⑦  |

**\*: Specificare gli “altri motivi” di insoddisfazione nell’uso dei servizi (ultima colonna della tabella precedente):**

|           |                            |               |
|-----------|----------------------------|---------------|
| Servizio: | Motivo di insoddisfazione: | Suggerimenti: |
| Servizio: | Motivo di insoddisfazione: | Suggerimenti: |
| Servizio: | Motivo di insoddisfazione: | Suggerimenti: |

**76. Quali ulteriori suggerimenti darebbe per migliorare ciò che non va? (N.B.: NON RISPONDERE SE L’ANZIANO NON E’ IN GRADO DI FARLO DA SOLO)**

---



---



---

| 77. | Pensando a strumenti e tecnologie moderne utilizzate per accedere ai servizi esistenti, mi può dire se li usa e se incontra difficoltà ad usarli? | Sì, da solo<br>(senza problemi) | Sì, con aiuto | No perché:    |              |
|-----|---------------------------------------------------------------------------------------------------------------------------------------------------|---------------------------------|---------------|---------------|--------------|
|     |                                                                                                                                                   |                                 |               | non so usarlo | non mi serve |
|     | Telefono cellulare (solo per audio chiamate e SMS)                                                                                                | ③                               | ②             | ①             | ①            |
|     | Smartphone (es. per audio/video chiamate, SMS, Whatsapp)                                                                                          | ③                               | ②             | ①             | ①            |
|     | PC o Tablet (es. per scrittura, posta Elettronica, social networks, skype, internet)                                                              | ③                               | ②             | ①             | ①            |
|     | Allarme o chiamata a distanza (es. Tele-Beghelli)                                                                                                 | ③                               | ②             | ①             | ①            |
|     | Altro (solo se non già menzionato sopra) _____                                                                                                    | ③                               | ②             | ①             | ①            |
|     | Altro (specificare: _____)                                                                                                                        | ③                               | ②             | ①             | ①            |

|     |                                                                                                |  |  |  |   |
|-----|------------------------------------------------------------------------------------------------|--|--|--|---|
| 78. | <b>In futuro, sarebbe disposto a prendere in considerazione il ricovero in casa di riposo?</b> |  |  |  |   |
|     | No, in nessun caso                                                                             |  |  |  | ① |
|     | Sì, ma solo se le mie condizioni peggiorassero                                                 |  |  |  | ② |
|     | Sì, anche se le mie condizioni rimanessero stabili                                             |  |  |  | ③ |

**F. Rapporti sociali e qualità della vita ((N.B.: NON RISPONDERE ALLE DOMANDE 79-87 SE L’ANZIANO NON E’ IN GRADO DI FARLO DA SOLO)**

Ora le chiederò come si sente rispetto ad alcuni aspetti della sua vita.

| 79. | Quanto è facile per Lei farsi aiutare dai Suoi vicini di casa, se ne ha bisogno? | Molto difficile<br>① | ②        | ③        | ④             | Molto facile<br>⑤ |
|-----|----------------------------------------------------------------------------------|----------------------|----------|----------|---------------|-------------------|
| 80. | Su quante persone vicine a Lei può contare realmente, se ha dei problemi?        | Nessuno<br>①         | 1-2<br>② | 3-5<br>③ | Più di 5<br>④ |                   |
| 81. | Le persone che Le stanno vicino si preoccupano concretamente per Lei?            | Per niente<br>①      | ②        | ③        | ④             | Molto<br>⑤        |

| Quanto spesso, nelle ultime due settimane, ... |                                                                                          | Sempre       | La maggior parte del tempo | Più della metà del tempo | Meno della metà del tempo | Qualche volta | Mai |
|------------------------------------------------|------------------------------------------------------------------------------------------|--------------|----------------------------|--------------------------|---------------------------|---------------|-----|
| 82.                                            | ...si è sentito allegro e di buonumore                                                   | ⑤            | ④                          | ③                        | ②                         | ①             | ①   |
| 83.                                            | ...si è sentito tranquillo e rilassato                                                   | ⑤            | ④                          | ③                        | ②                         | ①             | ①   |
| 84.                                            | ...si è sentito attivo e pieno di energie                                                | ⑤            | ④                          | ③                        | ②                         | ①             | ①   |
| 85.                                            | ...si è svegliato fresco e riposato                                                      | ⑤            | ④                          | ③                        | ②                         | ①             | ①   |
| 86.                                            | ...la sua vita quotidiana è stata ricca di cose che le interessano                       | ⑤            | ④                          | ③                        | ②                         | ①             | ①   |
| 87.                                            | <b>Nel complesso, come giudica la qualità della sua vita nelle ultime due settimane?</b> |              |                            |                          |                           |               |     |
|                                                | Molto cattiva<br>⑤                                                                       | Cattiva<br>④ | Né buona né cattiva<br>③   | Buona<br>②               | Molto buona<br>①          |               |     |

|     |                                                                                                                                           |           |           |
|-----|-------------------------------------------------------------------------------------------------------------------------------------------|-----------|-----------|
| 88. | <b>Nel corso dell'ultimo anno, ha o avrebbe avuto difficoltà a far fronte alle seguenti spese, se ne avesse avuto bisogno?</b>            | <b>Si</b> | <b>No</b> |
| a.  | affitto, bollette, mutuo o altro prestito                                                                                                 | ①         | ①         |
| b.  | riscaldamento adeguato dell'abitazione                                                                                                    | ①         | ①         |
| c.  | spese impreviste (pari a 650 euro se l'anziano vive solo; 1100 se in coppia; 1550 se in 3; 1800 se in 4; 2000 euro se in 5 o più persone) | ①         | ①         |
| d.  | un pasto adeguato almeno ogni due giorni (a base di carne, pesce o equiv. vegetariano)                                                    | ①         | ①         |
| e.  | una settimana di vacanza lontano da casa                                                                                                  | ①         | ①         |
| f.  | acquisto di un televisore a colori                                                                                                        | ①         | ①         |
| g.  | acquisto di una lavatrice                                                                                                                 | ①         | ①         |
| h.  | acquisto di un'automobile                                                                                                                 | ①         | ①         |
| i.  | acquisto di un telefono                                                                                                                   | ①         | ①         |
| j.  | pagamento dell'assistente privata ("badante")                                                                                             | ①         | ①         |
| k.  | visite specialistiche, acquisto di farmaci o esami diagnostici                                                                            | ①         | ①         |
| l.  | altre difficoltà (specificare) _____                                                                                                      | ①         | ①         |

**N.B.: SE L'ANZIANO E' SOLO E NON C'E' UN FAMIGLIARE CHE RISPONDA ALL'ALTRO QUESTIONARIO, SI PREGA DI SOTTOPORRE ALL'ANZIANO ANCHE LE DOMANDE C84 (IN PARTICOLARE SU INDENNITA' DI ACCOMPAGNAMENTO E ASSEgni DI CURA DI COMUNE E/O REGIONE), C85 E C86 DEL QUESTIONARIO PER IL FAMIGLIARE.**

89. C'è altro che vorrebbe aggiungere, per segnalare ciò che Regione, comune o ASL dovrebbero fare per aiutare persone anziane non autosufficienti come lei? \_\_\_\_\_

\_\_\_\_\_

\_\_\_\_\_

90. (N.B.: DA COMPILARE A CURA DELL'INTERVISTATORE AL TERMINE DELL'INTERVISTA) Le risposte alle domande del questionario sull'anziano sono state fornite da:

| anziano da solo | soprattutto dall'anziano | soprattutto dal familiare dell'anziano | dal familiare caregiver da solo |
|-----------------|--------------------------|----------------------------------------|---------------------------------|
| ①               | ②                        | ③                                      | ④                               |

## Annex 2. Questionnaire for informal caregiver

## Questionario per il FAMIGLIARE CAREGIVER

ID (codice intervista)

Data intervista

GG / MM / AA

N.B.: chiedere quale nome l'intervistato desidera usare per la persona a cui presta assistenza (ad esempio "mia madre", "Enrico"...), e usare quel nome quando nel testo appare la parola ANZIANO).

Domanda iniziale di verifica:

|     |                                                                                                                                                  |      |      |
|-----|--------------------------------------------------------------------------------------------------------------------------------------------------|------|------|
| C1. | E' lei il familiare che assiste maggiormente l'ANZIANO (di cui al primo questionario)? (in caso affermativo, procedere; altrimenti individuarlo) | Sì ① | No ② |
|-----|--------------------------------------------------------------------------------------------------------------------------------------------------|------|------|

|     |                                                    |                                                                                                                                                                                                                                                                                                                                                                                                                                                                                            |
|-----|----------------------------------------------------|--------------------------------------------------------------------------------------------------------------------------------------------------------------------------------------------------------------------------------------------------------------------------------------------------------------------------------------------------------------------------------------------------------------------------------------------------------------------------------------------|
| C2. | Età                                                | <input type="text"/>                                                                                                                                                                                                                                                                                                                                                                                                                                                                       |
| C3. | Sesso                                              | Maschile ①      Femminile ②                                                                                                                                                                                                                                                                                                                                                                                                                                                                |
| C4. | Cittadinanza                                       | <input type="text"/>                                                                                                                                                                                                                                                                                                                                                                                                                                                                       |
| C5. | Stato civile                                       | Coniugato/Convivente ①      Vedovo ②<br>Divorziato/Separato ③      Nubile/Celibe ④                                                                                                                                                                                                                                                                                                                                                                                                         |
| C6. | Titolo di studio                                   | <input type="text"/> Nessun titolo ①<br><input type="text"/> Licenza elementare ②<br><input type="text"/> Licenza media ③<br><input type="text"/> Diploma di scuola superiore ④<br><input type="text"/> Diploma post-secondario (non terziario) ⑤<br><input type="text"/> Diploma terziario di tipo professionale ⑥<br><input type="text"/> Laurea triennale (diploma accademico) ⑦<br><input type="text"/> Laurea specialistica (Master) ⑧<br><input type="text"/> Dottorato di ricerca ⑨ |
| C7. | Qual'è il suo rapporto di parentela CON L'ANZIANO? | Coniuge/Convivente ①      Figlia/o ②<br>Sorella/Fratello ③      Nuora/Genero ④<br>Zio/zia ⑤      Nipote (figlio/a di fratello) ⑥<br>Cugino/a ⑦      Cognato/a ⑧<br>Nipote (figlio/a di figlio/a) ⑨      Altro (specificare qui sotto) ⑩<br><input type="text"/>                                                                                                                                                                                                                            |
| C8. | Dove vivete, Lei e l'ANZIANO?                      | Nella stessa casa ①<br>In diversi appartamenti ma nello stesso palazzo ②<br>Ad una distanza raggiungibile a piedi ③<br>A 10 minuti di viaggio in auto, bus o treno ④<br>A 30 minuti di viaggio in auto, bus o treno ⑤<br>A non più di 1 ora di viaggio in auto, bus o treno ⑥<br>Ad oltre 1 ora di viaggio in auto, bus o treno ⑦                                                                                                                                                          |



**VORREMMO ORA PORRE ALCUNE DOMANDE SUL SUO RUOLO, SULLE SUE RESPONSABILITÀ E SU COME L'ATTIVITÀ DI ASSISTENZA HA INFLUITO SULLA SUA VITA.**

|             |                                                                                |              |                      |                      |
|-------------|--------------------------------------------------------------------------------|--------------|----------------------|----------------------|
| <b>C9.</b>  | <b>Da quanto tempo (in mesi) Lei assiste l'ANZIANO?</b>                        | <b>Mesi:</b> | <input type="text"/> | <input type="text"/> |
| <b>C10.</b> | <b>E, in media, quante ore a settimana dedica all'assistenza dell'ANZIANO?</b> | <b>Ore:</b>  | <input type="text"/> | <input type="text"/> |

|             |                                                                                                                     |                      |
|-------------|---------------------------------------------------------------------------------------------------------------------|----------------------|
| <b>C11.</b> | <b>A quanti familiari di 65 anni o più fornisce attualmente assistenza o supporto per più di 4 ore a settimana?</b> | <input type="text"/> |
| <b>C12.</b> | <b>A quante altre persone <u>non anziane</u> (ad es. figli, nipoti) Lei fornisce aiuto/ supporto?</b>               | <input type="text"/> |
| <b>C13.</b> | <b>Nel complesso, quante ore alla settimana dedica all'assistenza di tutte le altre persone, escluso l'ANZIANO?</b> | <input type="text"/> |

|             |                                                                     |                   |                     |                |
|-------------|---------------------------------------------------------------------|-------------------|---------------------|----------------|
| <b>C14.</b> | <b>A suo avviso, l'ANZIANO è al sicuro nella sua abitazione?</b>    |                   |                     |                |
|             | Molto sicuro                                                        | Abbastanza sicuro | Abbastanza insicuro | Molto insicuro |
|             | ①                                                                   | ②                 | ③                   | ④              |
|             | <b>Se insicuro (ultime due risposte, può spiegare perché?</b> _____ |                   |                     |                |

|             |                                                                                                          |        |          |                |
|-------------|----------------------------------------------------------------------------------------------------------|--------|----------|----------------|
| <b>C15.</b> | <b>Quanto si sente sicuro nel camminare da solo/a in questa zona/nel vicinato di sera quando è buio?</b> |        |          |                |
|             | Molto sicuro                                                                                             | Sicuro | Insicuro | Molto insicuro |
|             | ①                                                                                                        | ②      | ③        | ④              |
|             | <b>Se insicuro (ultime due risposte, può spiegare perché?</b> _____                                      |        |          |                |

**ALCUNE TRA LE SITUAZIONI PIÙ STRESSANTI PER CHI ASSISTE UN ANZIANO SONO LEGATE AI SUOI PROBLEMI DI MEMORIA E DI COMPORTAMENTO. IN PROPOSITO:**

|                                                                                                                                     |                                                                                                                                                                                                                                  |                                                                                                                            |                        |                   |            |
|-------------------------------------------------------------------------------------------------------------------------------------|----------------------------------------------------------------------------------------------------------------------------------------------------------------------------------------------------------------------------------|----------------------------------------------------------------------------------------------------------------------------|------------------------|-------------------|------------|
| <b>C16.</b>                                                                                                                         | <b>L'ANZIANO presenta problemi di comportamento?</b>                                                                                                                                                                             | <div style="display: flex; justify-content: space-between;"> <span>Sì ①</span> <span>No ②<br/>(vai alla C18)</span> </div> |                        |                   |            |
| (Come vagare per casa, ripetere continuamente ciò che ha udito, urlare senza motivo, ecc.)                                          |                                                                                                                                                                                                                                  |                                                                                                                            |                        |                   |            |
| <b>(N.B.: DA PORRE SOLO SE HA RISPOSTO SÌ ALLA DOMANDA PRECEDENTE) Con quale frequenza l'ANZIANO si comporta nei seguenti modi?</b> |                                                                                                                                                                                                                                  | <b>Gran parte del tempo</b>                                                                                                | <b>Qual -che volta</b> | <b>Rara-mente</b> | <b>Mai</b> |
| <b>C17.</b>                                                                                                                         | Vaga per casa o fuori casa o si comporta in modo pericoloso per la propria incolumità?                                                                                                                                           | ③                                                                                                                          | ②                      | ①                 | ②          |
| <b>C18.</b>                                                                                                                         | Ha difficoltà a condurre una normale conversazione, non si rende conto di avere dei problemi, non collabora con le Sue richieste?                                                                                                | ③                                                                                                                          | ②                      | ①                 | ②          |
| <b>C19.</b>                                                                                                                         | Si comporta in modi che La agitano? Per esempio le fa continuamente delle domande, la segue nei suoi spostamenti, ripete le stesse frasi, urla e strilla senza una particolare ragione, si veste o sveste in modo inappropriato? | ③                                                                                                                          | ②                      | ①                 | ②          |

|             |                                                                                                                              |                                                       |   |
|-------------|------------------------------------------------------------------------------------------------------------------------------|-------------------------------------------------------|---|
| <b>C20.</b> | <b>Se Lei fosse malato, ci sarebbe qualcuno che potrebbe aiutarla nell'assistenza all'ANZIANO?</b>                           | Sì, potrei trovare qualcuno abbastanza facilmente     | ① |
|             |                                                                                                                              | Sì, potrei trovare qualcuno ma con qualche difficoltà | ② |
|             |                                                                                                                              | No, nessuno                                           | ③ |
| <b>C21.</b> | <b>Se Lei avesse bisogno di una pausa dall'assistenza, ci sarebbe qualcuno che potrebbe badare all'ANZIANO al suo posto?</b> | Sì, potrei trovare qualcuno abbastanza facilmente     | ① |
|             |                                                                                                                              | Sì, potrei trovare qualcuno ma con qualche difficoltà | ② |
|             |                                                                                                                              | No, nessuno                                           | ③ |

| C22. | Carico assistenziale                                                                                      | Mai | Raramente | Qualche volta | Spesso | Quasi sempre |
|------|-----------------------------------------------------------------------------------------------------------|-----|-----------|---------------|--------|--------------|
|      | Ritiene di non avere abbastanza tempo per sè stessa a causa del tempo dedicato all'ANZIANO?               | ①   | ①         | ②             | ③      | ④            |
|      | Si sente stressato tra il prendersi cura dell'ANZIANO e il cercare di far fronte ad altre responsabilità? | ①   | ①         | ②             | ③      | ④            |
|      | Si sente affaticato quando si occupa dell'ANZIANO?                                                        | ①   | ①         | ②             | ③      | ④            |
|      | Si sente insicuro su cosa fare per il suo ANZIANO?                                                        | ①   | ①         | ②             | ③      | ④            |

| Le prossime domande si riferiscono al sostegno che lei sente di avere come familiare che assiste: |                                                                                                  | Sempre | Spesso | A volte | Mai |
|---------------------------------------------------------------------------------------------------|--------------------------------------------------------------------------------------------------|--------|--------|---------|-----|
| C23.                                                                                              | Riesce a svolgere in modo soddisfacente il Suo ruolo di assistente?                              | ④      | ③      | ②       | ①   |
| C24.                                                                                              | Trova che assistere sia troppo impegnativo?                                                      | ①      | ②      | ③       | ④   |
| C25.                                                                                              | Assistere Le crea qualche difficoltà nei rapporti con i Suoi amici?                              | ①      | ②      | ③       | ④   |
| C26.                                                                                              | Assistere ha un effetto negativo sul Suo stato di salute fisica?                                 | ①      | ②      | ③       | ④   |
| C27.                                                                                              | Assistere le crea delle difficoltà nei rapporti con la Sua famiglia?                             | ①      | ②      | ③       | ④   |
| C28.                                                                                              | Fornire assistenza Le causa difficoltà finanziarie?                                              | ①      | ②      | ③       | ④   |
| C29.                                                                                              | Si sente "intrappolato" nel Suo ruolo di assistente?                                             | ①      | ②      | ③       | ④   |
| C30.                                                                                              | Si sente adeguatamente sostenuto dai Suoi amici/vicini di casa?                                  | ④      | ③      | ②       | ①   |
| C31.                                                                                              | Trova che valga la pena fornire assistenza?                                                      | ④      | ③      | ②       | ①   |
| C32.                                                                                              | Si sente adeguatamente sostenuto dalla Sua famiglia?                                             | ④      | ③      | ②       | ①   |
| C33.                                                                                              | Ha un buon rapporto con la persona che assiste?                                                  | ④      | ③      | ②       | ①   |
| C34.                                                                                              | Si sente adeguatamente sostenuto dai servizi sanitari e sociali (pubblici, privati o volontari)? | ④      | ③      | ②       | ①   |
| C35.                                                                                              | Ritiene di essere apprezzato per il fatto che Lei assiste?                                       | ④      | ③      | ②       | ①   |
| C36.                                                                                              | Assistere ha un effetto negativo sul Suo equilibrio emotivo?                                     | ④      | ③      | ②       | ①   |
| C37.                                                                                              | Nell'insieme, si sente adeguatamente sostenuto nel Suo ruolo di assistente?                      | ④      | ③      | ②       | ①   |

| C38. | In generale, come giudica la sua salute:                                          |  |             |  |                     |                            |                          |                           |               |             |  |
|------|-----------------------------------------------------------------------------------|--|-------------|--|---------------------|----------------------------|--------------------------|---------------------------|---------------|-------------|--|
|      | Eccellente                                                                        |  | Molto buona |  | Buona               |                            | Discreta                 |                           | Cattiva       |             |  |
|      | ①                                                                                 |  | ②           |  | ③                   |                            | ④                        |                           | ⑤             |             |  |
|      | Nelle ultime due settimane ...                                                    |  |             |  | Sempre              | La maggior parte del tempo | Più della metà del tempo | Meno della metà del tempo | Qualche volta | Mai         |  |
| C39. | Mi sono sentito allegro e di buonumore                                            |  |             |  | ⑤                   | ④                          | ③                        | ②                         | ①             | ①           |  |
| C40. | Mi sono sentito tranquillo e rilassato                                            |  |             |  | ⑤                   | ④                          | ③                        | ②                         | ①             | ①           |  |
| C41. | Mi sono sentito attivo e pieno di energie                                         |  |             |  | ⑤                   | ④                          | ③                        | ②                         | ①             | ①           |  |
| C42. | Mi sono svegliato fresco e riposato                                               |  |             |  | ⑤                   | ④                          | ③                        | ②                         | ①             | ①           |  |
| C43. | La mia vita quotidiana è stata ricca di cose che mi interessano                   |  |             |  | ⑤                   | ④                          | ③                        | ②                         | ①             | ①           |  |
| C44. | Nel complesso, come giudica la qualità della sua vita nelle ultime due settimane? |  |             |  |                     |                            |                          |                           |               |             |  |
|      | Molto cattiva                                                                     |  | Cattiva     |  | Né buona né cattiva |                            |                          | Buona                     |               | Molto buona |  |

|   |   |   |   |   |
|---|---|---|---|---|
| ⑤ | ④ | ③ | ② | ① |
|---|---|---|---|---|

|             |                                                                                         |                       |                                                      |                       |
|-------------|-----------------------------------------------------------------------------------------|-----------------------|------------------------------------------------------|-----------------------|
| <b>C45.</b> | <b>Ci sono dei servizi che Lei o l'ANZIANO non usate, ma dei quali avreste bisogno?</b> |                       |                                                      |                       |
|             | <b>NO</b><br>(in tal caso, andare alla domanda C48) ①                                   |                       | <b>SI</b><br>(rispondere a domande in zona grigia) ① |                       |
| <b>C46.</b> | <b>Se sì, quali? (riportare qui sotto i 3 più importanti)</b>                           |                       |                                                      |                       |
| <b>C47.</b> | <b>E perché non li utilizzate? (N.B.: barrare tutte le caselle che interessano)</b>     | <b>Servizio 1:</b>    | <b>Servizio 2:</b>                                   | <b>Servizio 3:</b>    |
|             | <b>Troppo costoso</b>                                                                   | <input type="radio"/> | <input type="radio"/>                                | <input type="radio"/> |
|             | <b>Troppo distante</b>                                                                  | <input type="radio"/> | <input type="radio"/>                                | <input type="radio"/> |
|             | <b>Bassa qualità del servizio</b>                                                       | <input type="radio"/> | <input type="radio"/>                                | <input type="radio"/> |
|             | <b>Non più disponibile</b>                                                              | <input type="radio"/> | <input type="radio"/>                                | <input type="radio"/> |
|             | <b>Mancanza/perdita dei requisiti per usarlo</b>                                        | <input type="radio"/> | <input type="radio"/>                                | <input type="radio"/> |
|             | <b>Altro motivo (specificare)</b>                                                       |                       |                                                      |                       |

| Nella sua situazione <u>attuale</u> , per lei e per l'ANZIANO, quanto è importante un supporto che fornisca...? | Importanza   |       |            |      |           | Di quali lei avrebbe maggior bisogno?<br>(max 3) |
|-----------------------------------------------------------------------------------------------------------------|--------------|-------|------------|------|-----------|--------------------------------------------------|
|                                                                                                                 | Estremamente | Molto | Abbastanza | Poco | Per nulla |                                                  |
| <b>C48</b> Informazioni su aiuti e supporti disponibili, e come accedervi                                       | ④            | ③     | ②          | ①    | ①         | ①                                                |
| <b>C49</b> Informazioni sulle malattie dell'ANZIANO                                                             | ④            | ③     | ②          | ①    | ①         | ①                                                |
| <b>C50</b> Formazione per sviluppare le abilità che le servono per assistere                                    | ④            | ③     | ②          | ①    | ①         | ①                                                |
| <b>C51</b> Opportunità di partecipare ad attività fuori dell'assistenza                                         | ④            | ③     | ②          | ①    | ①         | ①                                                |
| <b>C52</b> Possibilità di fare una vacanza o una pausa dall'assistenza                                          | ④            | ③     | ②          | ①    | ①         | ①                                                |
| <b>C53</b> Opportunità per l'ANZIANO di intraprendere attività che lo divertano                                 | ④            | ③     | ②          | ①    | ①         | ①                                                |
| <b>C54</b> Aiuto nel pianificare l'assistenza futura                                                            | ④            | ③     | ②          | ①    | ①         | ①                                                |
| <b>C55</b> Possibilità di conciliare l'assistenza con il lavoro retribuito                                      | ④            | ③     | ②          | ①    | ①         | ①                                                |
| <b>C56</b> Possibilità di partecipare ad un gruppo di supporto per familiari di anziani                         | ④            | ③     | ②          | ①    | ①         | ①                                                |
| <b>C57</b> Più denaro per comprare ciò che è utile a fornire un'assistenza adeguata                             | ④            | ③     | ②          | ①    | ①         | ①                                                |
| <b>C58</b> Opportunità di passare più tempo con la Sua famiglia                                                 | ④            | ③     | ②          | ①    | ①         | ①                                                |
| <b>C59</b> Aiuto per adattare l'ambiente abitativo dell'ANZIANO                                                 | ④            | ③     | ②          | ①    | ①         | ①                                                |

| Caratteristiche dei servizi                                           |                                                                                 | Importanza    |       |            |      |           | Al momento, di quali lei sente di più la mancanza? (max 3) |
|-----------------------------------------------------------------------|---------------------------------------------------------------------------------|---------------|-------|------------|------|-----------|------------------------------------------------------------|
| Nella sua situazione <u>attuale</u> , quanto è importante per Lei...? |                                                                                 | Estrema mente | Molto | Abbastanza | Poco | Per nulla |                                                            |
| C60.                                                                  | Che l'aiuto sia disponibile nel momento in cui Lei ne ha più bisogno            | ④             | ③     | ②          | ①    | ①         | ①                                                          |
| C61.                                                                  | Che l'aiuto si adatti bene ai Suoi orari e alle Sue abitudini                   | ④             | ③     | ②          | ①    | ①         | ①                                                          |
| C62.                                                                  | Che l'aiuto arrivi quando è stato promesso                                      | ④             | ③     | ②          | ①    | ①         | ①                                                          |
| C63.                                                                  | Che gli addetti all'assistenza abbiano le capacità e la preparazione necessarie | ④             | ③     | ②          | ①    | ①         | ①                                                          |
| C64.                                                                  | Che gli addetti all'assistenza trattino l'ANZIANO con dignità e rispetto        | ④             | ③     | ②          | ①    | ①         | ①                                                          |
| C65.                                                                  | Che gli addetti all'assistenza La trattino con dignità e rispetto               | ④             | ③     | ②          | ①    | ①         | ①                                                          |
| C66.                                                                  | Che il Suo punto di vista e le Sue opinioni siano ascoltate                     | ④             | ③     | ②          | ①    | ①         | ①                                                          |
| C67.                                                                  | Che l'aiuto fornito migliori la qualità di vita dell'ANZIANO                    | ④             | ③     | ②          | ①    | ①         | ①                                                          |
| C68.                                                                  | Che l'aiuto migliori la Sua qualità di vita                                     | ④             | ③     | ②          | ①    | ①         | ①                                                          |
| C69.                                                                  | Che l'aiuto fornito non sia troppo costoso                                      | ④             | ③     | ②          | ①    | ①         | ①                                                          |
| C70.                                                                  | Che l'aiuto venga sempre dallo stesso addetto                                   | ④             | ③     | ②          | ①    | ①         | ①                                                          |
| C71.                                                                  | Che l'aiuto consideri sia i Suoi bisogni, sia quelli dell'ANZIANO               | ④             | ③     | ②          | ①    | ①         | ①                                                          |

|      |                                                                                                   |  |  |  |  |   |
|------|---------------------------------------------------------------------------------------------------|--|--|--|--|---|
| C72. | <b>Per il futuro, cosa pensa dell'idea di ricorrere ad una struttura come una casa di riposo?</b> |  |  |  |  |   |
|      | No, in nessun caso                                                                                |  |  |  |  | ① |
|      | Sì, ma solo se le condizioni dell'ANZIANO peggiorassero                                           |  |  |  |  | ② |
|      | Sì, anche se le condizioni dell'ANZIANO rimanessero stabili                                       |  |  |  |  | ③ |

|      |                                                                                                                                                                                                                                            |
|------|--------------------------------------------------------------------------------------------------------------------------------------------------------------------------------------------------------------------------------------------|
| C73. | <b>Lei sta attualmente lavorando?</b><br><div> <div>Sì ①<br/>(rispondere alle domande nella sezione grigia)</div> <div>No ①<br/>Andare alla domanda C79</div> </div>                                                                       |
|      | <b>Quante ore lavora in una settimana tipo?</b> <input type="text"/>                                                                                                                                                                       |
| C74. | <b>Se Lei lavora, Lei è...?</b><br><div> <div>Lavoratore dipendente nel settore privato ①</div> <div>Lavoratore dipendente nel settore pubblico ②</div> <div>Lavoratore autonomo ③</div> <div>Altro (specificare qui sotto) ④</div> </div> |
|      | <input type="text"/>                                                                                                                                                                                                                       |
| C75. | <b>Il fatto di assistere l'ANZIANO l'ha spinto a ridurre il suo orario di lavoro?</b><br><div> <div>Sì ①</div> <div>No ①</div> </div> <div>In tal caso andare alla domanda C81</div>                                                       |
|      | <b>Se sì, di quante ore alla settimana?</b> <input type="text"/>                                                                                                                                                                           |
| C76. | <b>Qual è stata la variazione del suo reddito al mese?</b><br><div> <div>Segno della variazione</div> <div>Positivo ①</div> <div>Negativo ②</div> </div>                                                                                   |
| C77. | <b>Fa ricorso ai benefici della legge 104/1992?</b><br><div> <div>Sì ①</div> <div>No ①</div> </div>                                                                                                                                        |
| C78. | <b>Se sì, di quali?</b> <input type="text"/>                                                                                                                                                                                               |

| CHIEDERE DOMANDE SEGUENTI SOLO A CHI NON LAVORA |                                                                                                                                                                     |              |                                     |
|-------------------------------------------------|---------------------------------------------------------------------------------------------------------------------------------------------------------------------|--------------|-------------------------------------|
| C79.                                            | Se non lavora, Lei è ...?                                                                                                                                           | Pensionato ① | Non occupato e in cerca di lavoro ② |
|                                                 | In aspettativa/congedo per motivi di salute ma intenzionato a tornare a lavorare ③                                                                                  |              | Casalinga/casalingo ④               |
| C80.                                            | Se Lei non lavora, l'attività di assistenza ha determinato alcune delle seguenti restrizioni alla sua vita lavorativa o alla sua carriera? (possibili più risposte) |              |                                     |
|                                                 | Non mi consente di lavorare ①                                                                                                                                       |              |                                     |
|                                                 | Ho dovuto smettere di lavorare ② In tal caso, quante ore a settimana lavorava prima di smettere? _____                                                              |              |                                     |
| C81.                                            | <b>CHIEDERE A TUTTI:</b> L'attività di assistenza ha determinato alcune delle seguenti restrizioni alla sua vita lavorativa o alla sua carriera?                    |              |                                     |
|                                                 | Non posso (o non ho potuto) sviluppare la mia carriera professionale o i miei studi                                                                                 | Sì ①         | No ②                                |
|                                                 | Posso (o ho potuto) lavorare solo saltuariamente                                                                                                                    | Sì ①         | No ②                                |
|                                                 | Altro (specificare sotto)                                                                                                                                           | Sì ①         | No ②                                |
|                                                 | Specificazione di "Altro": _____                                                                                                                                    |              |                                     |

Vorremmo conoscere ora la sua opinione su alcune nuove tecnologie nel supporto dei famigliari che assistono persone anziane non autosufficienti.

| C82. | Tecnologie                 | Non so cos'è | So cos'è...      |                 | Secondo lei, questo strumento è o potrebbe essere utile per entrare in contatto con: |      |            |       |                                                                                         |      |            |       |
|------|----------------------------|--------------|------------------|-----------------|--------------------------------------------------------------------------------------|------|------------|-------|-----------------------------------------------------------------------------------------|------|------------|-------|
|      |                            |              | ...ma non lo uso | ...e lo uso già | Altri famigliari con cui discutere e supportarsi reciprocamente                      |      |            |       | Professionisti socio-sanitari (ad es. medico, psicologo, ecc.) da cui ricevere supporto |      |            |       |
|      |                            |              |                  |                 | per niente                                                                           | poco | abbastanza | molto | per niente                                                                              | poco | abbastanza | molto |
|      | Social network dedicati    | ①            | ①                | ①               | ①                                                                                    | ②    | ③          | ④     | ①                                                                                       | ②    | ③          | ④     |
|      | Messaggi privati           | ①            | ①                | ①               | ①                                                                                    | ②    | ③          | ④     | ①                                                                                       | ②    | ③          | ④     |
|      | Forum online               | ①            | ①                | ①               | ①                                                                                    | ②    | ③          | ④     | ①                                                                                       | ②    | ③          | ④     |
|      | Chat                       | ①            | ①                | ①               | ①                                                                                    | ②    | ③          | ④     | ①                                                                                       | ②    | ③          | ④     |
|      | Videocchat                 | ①            | ①                | ①               | ①                                                                                    | ②    | ③          | ④     | ①                                                                                       | ②    | ③          | ④     |
|      | Altro (specificare): _____ |              |                  |                 |                                                                                      |      |            |       |                                                                                         |      |            |       |
|      | _____                      | ①            | ①                | ①               | ①                                                                                    | ②    | ③          | ④     | ①                                                                                       | ②    | ③          | ④     |

Passiamo ora a qualche domanda finale sulle spese per l'assistenza.

| C83. | L'attività assistenziale ha procurato delle spese aggiuntive a lei, come famigliare, che le hanno creato dei problemi nell'ultimo anno? | Non ho avuto spese aggiuntive | Se le ha avute, le hanno creato dei problemi? |      |            |       |
|------|-----------------------------------------------------------------------------------------------------------------------------------------|-------------------------------|-----------------------------------------------|------|------------|-------|
|      |                                                                                                                                         |                               | per niente                                    | poco | abbastanza | molto |
| a.   | Adattamento di ambienti domestici e/o mobilio                                                                                           | ①                             | ①                                             | ②    | ③          | ④     |
| b.   | Spese di trasporto                                                                                                                      | ①                             | ①                                             | ②    | ③          | ④     |
| c.   | Visite specialistiche o esami di laboratorio                                                                                            | ①                             | ①                                             | ②    | ③          | ④     |
| d.   | Farmaci e/o cibi speciali                                                                                                               | ①                             | ①                                             | ②    | ③          | ④     |
| e.   | Ausili (protesi, dispositivi vari etc.)                                                                                                 | ①                             | ①                                             | ②    | ③          | ④     |
| f.   | assistente privata ("badante")                                                                                                          | ①                             | ①                                             | ②    | ③          | ④     |
| g.   | altre spese (specificare: _____)                                                                                                        | ①                             | ①                                             | ②    | ③          | ④     |

**Torniamo per un attimo all'ANZIANO (N.B.: RIVOLGERE O RIFERIRE LE DOMANDE ALL'ANZIANO):**

|      |                                                                                                   |    |    |
|------|---------------------------------------------------------------------------------------------------|----|----|
| C84. | Quali sono le fonti del reddito mensile individuale dell'ANZIANO?                                 | sì | no |
|      | Pensione da lavoro                                                                                | ①  | ②  |
|      | Pensione sociale <i>(per persone oltre i 67 anni con redditi inferiori a 5.954,00 euro annui)</i> | ①  | ②  |
|      | Pensione di invalidità o indennità di disabilità                                                  | ①  | ②  |
|      | Indennità di accompagnamento                                                                      | ①  | ②  |
|      | Pensione ai superstiti/di reversibilità <i>(per vedovi/e, eredi di deceduti)</i>                  | ①  | ②  |
|      | Rendite/redditi da patrimonio <i>(affitti, interessi su titoli, dividendi, ecc.)</i>              | ①  | ②  |
|      | Assegno di cura del Comune <i>(contributo spendibile anche per assistenza privata)</i>            | ①  | ②  |
|      | Assegno di cura della Regione                                                                     | ①  | ②  |
|      | Altre fonti (specificare) _____                                                                   | ①  | ②  |
|      | Nessuna fonte di reddito <i>(in tal caso saltare le due domande successive)</i>                   | ①  | ②  |

|      |                                                                                                                                                    |                     |                     |                     |                     |                     |                           |
|------|----------------------------------------------------------------------------------------------------------------------------------------------------|---------------------|---------------------|---------------------|---------------------|---------------------|---------------------------|
| C85. | Considerando tutte le fonti, in quale fascia si colloca l'importo del <u>reddito individuale netto mensile dell'ANZIANO</u> , approssimativamente? |                     |                     |                     |                     |                     |                           |
|      | Meno di 250 euro al mese<br>①                                                                                                                      | Da 250 a 500<br>②   | Da 500 a 750<br>③   | Da 750 a 1000<br>④  | Da 1000 a 1500<br>⑤ | Da 1500 a 2000<br>⑥ | Oltre 2000 euro/mese<br>⑦ |
| C86. | E quello <u>famigliare netto complessivo del nucleo dell'ANZIANO</u> ?                                                                             |                     |                     |                     |                     |                     |                           |
|      | Meno di 1000<br>①                                                                                                                                  | da 1000 a 1500<br>② | da 1500 a 2000<br>③ | Da 2000 a 2500<br>④ | Da 2500 a 3000<br>⑤ | Oltre 3000<br>⑥     |                           |

**C87. C'è nient'altro che vorrebbe aggiungere, per segnalare ciò che la Regione, il comune o la ASL dovrebbero fare per aiutare i FAMIGLIARI di persone anziane non autosufficienti come quella che lei assiste?**

---



---



---



---



---



---



---

(ringraziare e chiudere l'intervista)
